# Supplementary material for: Targeting HIV-1 Reverse Transcriptase Using a Fragment-Based Approach
Source: MDPI journal article supplement (doi:10.3390/molecules28073103), 2023-03-30
Supplement: s1 [file s1]

## Supporting Information

### Targeting HIV-1 Reverse Transcriptase using a Fragment-Based Approach

**Mahta Mansouri**<sup>1,†</sup>, **Shawn Rumrill**<sup>2,†</sup>, **Shane Dawson**<sup>1</sup>, **Adam Johnson**<sup>3</sup>,  
**Jo-Anne Pinson**<sup>1</sup>, **Menachem J. Gunzburg**<sup>1</sup>, **Catherine F. Latham**<sup>3</sup>, **Nicholas Barlow**<sup>1</sup>,  
**George W. Mbogo**<sup>3</sup>, **Paula Ellenberg**<sup>3</sup>, **Stephen J. Headey**<sup>1</sup>, **Nicolas Sluis-Cremer**<sup>4</sup>, **David**  
**Tyssen**<sup>3</sup>, **Joseph D. Bauman**<sup>2</sup>, **Francesc X. Ruiz**<sup>2</sup>, **Eddy Arnold**<sup>2,\*</sup>, **David K. Chalmers**<sup>1,\*</sup>  
**and Gilda Tachedjian**<sup>3,5,6,\*</sup>

<sup>1</sup> Medicinal Chemistry, Monash Institute of Pharmaceutical Sciences, Monash University, Parkville, VIC 3052, Australia

<sup>2</sup> Center for Advanced Biotechnology and Medicine, and Department of Chemistry and Chemical Biology, Rutgers University, Piscataway, NJ 08854, USA

<sup>3</sup> Retroviral Biology and Antivirals Laboratory, Disease Elimination Program, Life Sciences Discipline, Burnet Institute, Melbourne, VIC 3004, Australia

<sup>4</sup> Division of Infectious Diseases, Department of Medicine, University of Pittsburgh School of Medicine, Pittsburgh, PA 15261, USA

<sup>5</sup> Department of Microbiology, Monash University, Clayton, VIC 3168, Australia

<sup>6</sup> Department of Microbiology and Immunology at Peter Doherty Institute for Infection and Immunity, University of Melbourne, Melbourne, VIC 3000, Australia

\* Correspondence: [arnold@cabm.rutgers.edu](mailto:arnold@cabm.rutgers.edu) (E.A.); [david.chalmers@monash.edu](mailto:david.chalmers@monash.edu) (D.K.C.); [gilda.tachedjian@burnet.edu.au](mailto:gilda.tachedjian@burnet.edu.au) (G.T.)

† These authors contributed equally to this work.

### Supporting information table of contents

1. Table S1: Binding site, chemical structure, and potency of HIV-1 RT fragments hits discovered by Bauman *et al.*
2. Table S2: HIV-1 RT inhibition, dissociation constants and ligand efficiencies of Series 2 compounds
3. Figure S1: SPR curves for compounds **2**, **6** and **27**
4. Figure S2: Dose response curves for compounds **B-1** and **27** determined using the Picogreen RT DDDP assay
5. Table S3: X-ray data and refinement statistics for PDB 8FFX
6. Figure S3: Interactions of compound **27** with neighboring waters in the NNIBP
7. Figure S4: SWISSADME analysis summary of compound **27**
8. Figure S5: Chemical structures of NNRTIs and compound **27** described in this study

**Table S1.** Binding site, chemical structure, and potency of HIV-1 RT fragments hits discovered by Bauman et al. [7].

| Site                               | IC <sub>50</sub> (μM) | Compound   | Structure                                                                            |
|------------------------------------|-----------------------|------------|--------------------------------------------------------------------------------------|
| 428                                | N/A                   | 7          | 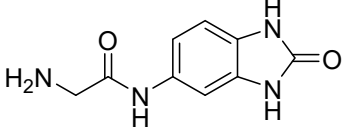   |
| RNase H<br>Primer Grip<br>Adjacent | N/A                   | 9          |    |
| 507                                | 150                   | 8          |    |
| 399                                | N/A                   | 6          |  |
| NNRTI<br>Adjacent                  | 350                   | <b>B-1</b> |  |
| Knuckles                           | 600                   | 3          |  |
| Incoming<br>Nucleotide<br>Binding  | 200                   | 5          |  |

**Table S2.** HIV-1 RT inhibition, dissociation constants and ligand efficiencies of Series 2 compounds.

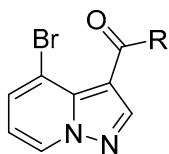

| #         | R <sub>1</sub>                                    | RT Inhibition - IC <sub>50</sub> ± SEM (μM) <sup>a</sup> | SPR - K <sub>D</sub> (μM) <sup>b</sup> |       |       |
|-----------|---------------------------------------------------|----------------------------------------------------------|----------------------------------------|-------|-------|
|           |                                                   | WT                                                       | WT                                     | K103N | Y181C |
| <b>17</b> | -OH                                               | >1000                                                    | NB                                     | NB    | NB    |
| <b>18</b> | -OCH <sub>3</sub>                                 | >1000 <sup>c</sup>                                       | -                                      | -     | -     |
| <b>19</b> | -OCH <sub>2</sub> CH <sub>3</sub>                 | >1000 <sup>c</sup>                                       | -                                      | -     | -     |
| <b>20</b> | -NHCH <sub>2</sub> CH <sub>3</sub>                | >1000                                                    | -                                      | -     | -     |
| <b>21</b> | -N(CH <sub>2</sub> CH <sub>3</sub> ) <sub>2</sub> | -                                                        | -                                      | -     | -     |
| <b>22</b> | -NHCH <sub>2</sub> CH <sub>2</sub> PhOH           | 111.4 <sup>c</sup>                                       | -                                      | -     | -     |

<sup>a</sup> The 50% inhibitory concentration (IC<sub>50</sub>) values were determined by assessing inhibition of HIV-1 RT DNA-dependent DNA Polymerase (DDDP) activity using the nonradioactive PicoGreen or <sup>33</sup>P radiolabeled assay. IC<sub>50</sub> values were determined from at least  $n \geq 2$  independent assays. <sup>b</sup> Dissociation constants (K<sub>D</sub>) were measured using surface plasmon resonance (SPR). <sup>c</sup> RT DDDP inhibitory activity determined using the PicoGreen assay. NB denotes no binding observed. – denotes not determined.

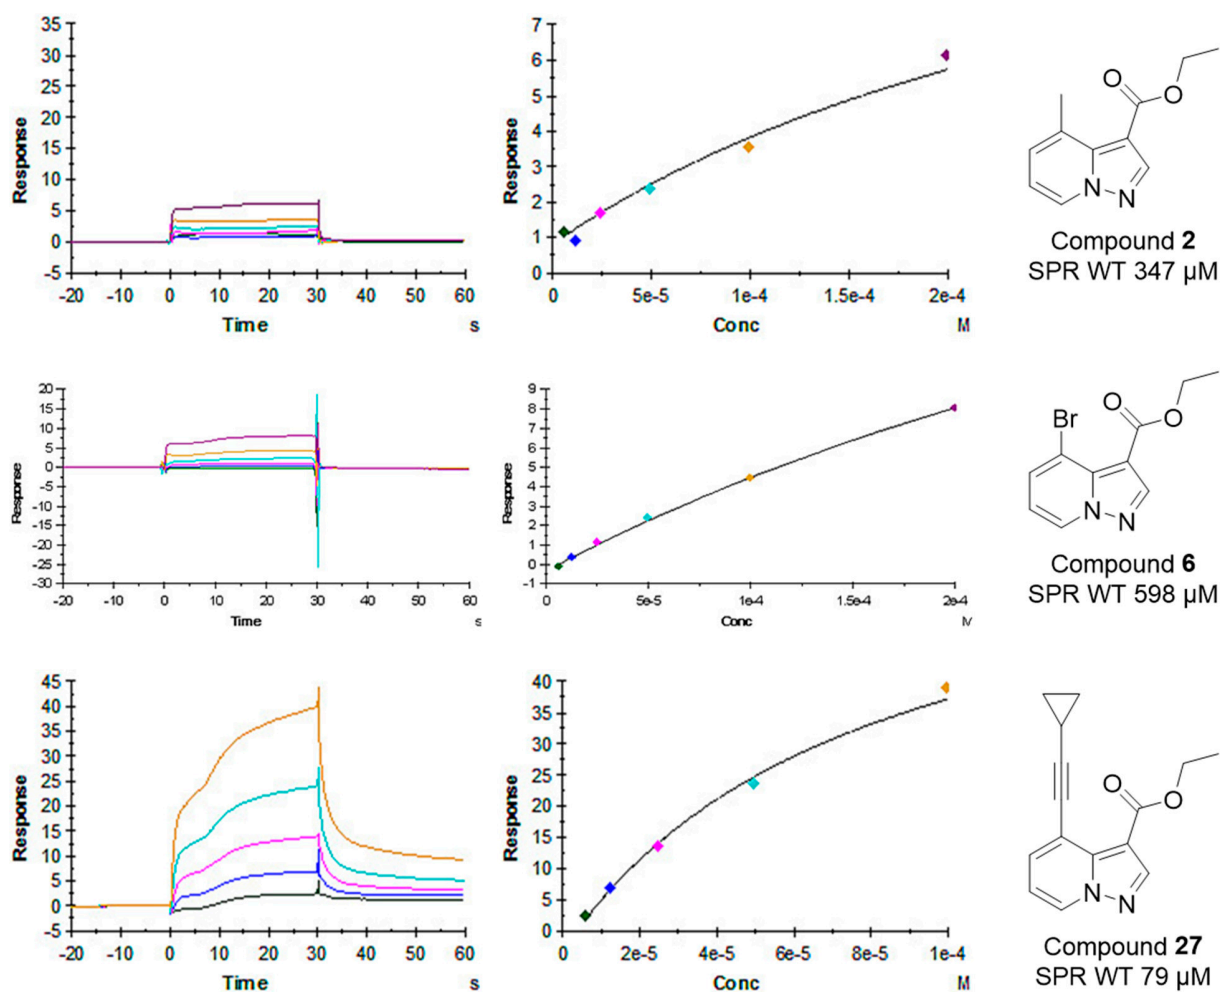

Figure S1. SPR curves for compounds 2, 6 and 27.

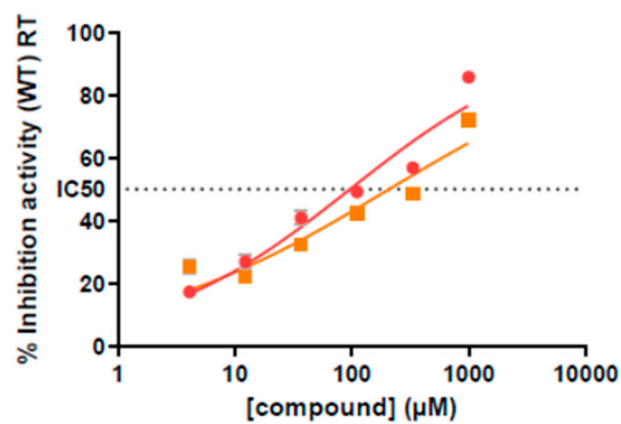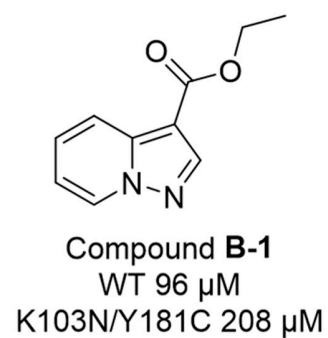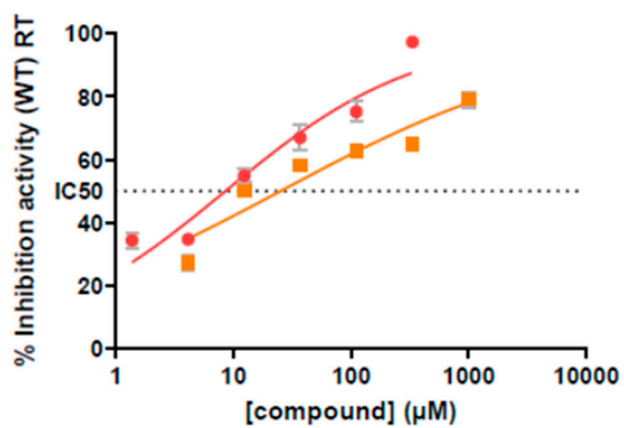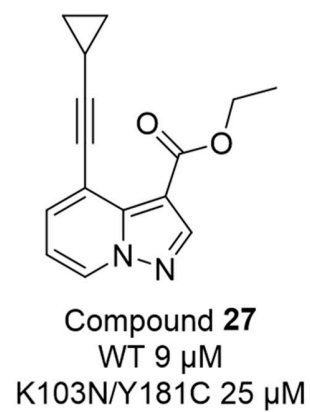

Figure S2. Dose response curves for compounds **B-1** and **27** determined using the Picogreen RT DDDP assay.

**Table S3.** X-ray data and refinement statistics for PDB 8FFX.

|                                                                                                     |                                          |
|-----------------------------------------------------------------------------------------------------|------------------------------------------|
| Protein Data Bank (PDB) accession code                                                              | 8FFX                                     |
| Wavelength ( Å)                                                                                     | 1.033                                    |
| Resolution range (last shell) ( Å)                                                                  | 48.29 - 2.42 (2.51 - 2.42)               |
| Space group                                                                                         | C2                                       |
| <i>Cell constants</i><br>( <i>a</i> , <i>b</i> , <i>c</i> in Å; $\alpha$ , $\beta$ , $\gamma$ in °) | 161.95, 73.38, 107.97, 90.0, 100.1, 90.0 |
| Total reflections (last shell)                                                                      | 95241 (9331)                             |
| Unique reflections (last shell)                                                                     | 47666 (4692)                             |
| Multiplicity (last shell)                                                                           | 2.0 (2.0)                                |
| Completeness (last shell) (%)                                                                       | 98.98 (95.54)                            |
| Mean I/sigma(I) (last shell)                                                                        | 9.75 (1.62)                              |
| Wilson B-factor                                                                                     | 54.47                                    |
| R-merge (last shell)                                                                                | 0.088 (-17.150)                          |
| R-meas                                                                                              | 0.124 (-24.260)                          |
| R-pim                                                                                               | 0.088 (-17.150)                          |
| CC1/2                                                                                               | 0.425 (0.288)                            |
| CC*                                                                                                 | 0.772 (0.668)                            |
| Reflections used in refinement                                                                      | 47358 (4556)                             |
| Reflections used for R-free                                                                         | 1989 (193)                               |
| R-work                                                                                              | 0.214 (0.335)                            |
| R-free                                                                                              | 0.266 (0.394)                            |
| CC(work)                                                                                            | 0.951 (0.374)                            |
| CC(free)                                                                                            | 0.923 (0.549)                            |
| Number of non-hydrogen atoms                                                                        | 8124                                     |
| macromolecules                                                                                      | 7951                                     |
| ligands                                                                                             | 40                                       |
| solvent                                                                                             | 123                                      |
| Protein residues                                                                                    | 971                                      |

|                           |       |
|---------------------------|-------|
| Nucleic acid bases        | N/A   |
| RMS(bonds)                | 0.005 |
| RMS(angles)               | 0.70  |
| Ramachandran favored (%)  | 96.06 |
| Ramachandran allowed (%)  | 3.73  |
| Ramachandran outliers (%) | 0.23  |
| Rotamer outliers (%)      | 0.46  |
| Clashscore                | 6.79  |
| Average B-factor          | 82.23 |
| macromolecules            | 82.54 |
| ligands                   | 91.00 |
| solvent                   | 58.49 |
| Number of TLS groups      | 1     |

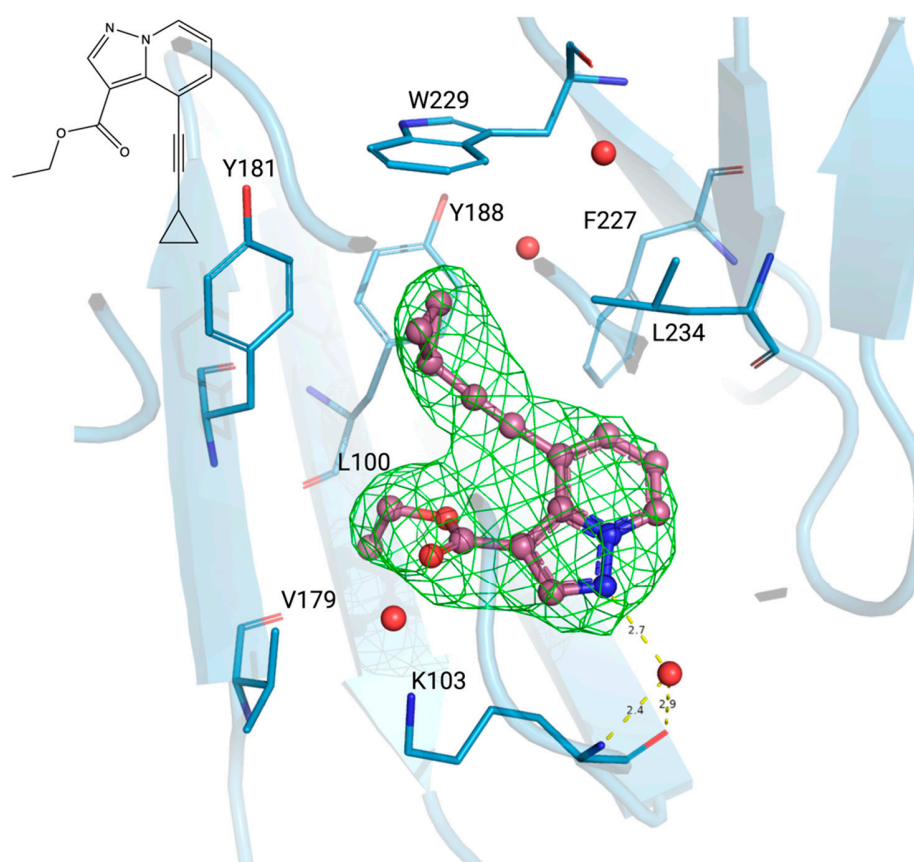

Figure S3. Interactions of compound **27** with neighboring waters in the NNIBP (PDB ID 8FFX). Atomic model of **27** (white) bound to HIV-1 RT residues (pale cyan). Pocket residues forming hydrophobic interactions shows as sticks. Polder OMIT mFo-DFc map density (green mesh, 3 $\sigma$ ) of **27**. Water molecules shown as red spheres. Created using Pymol and BioRender.com.



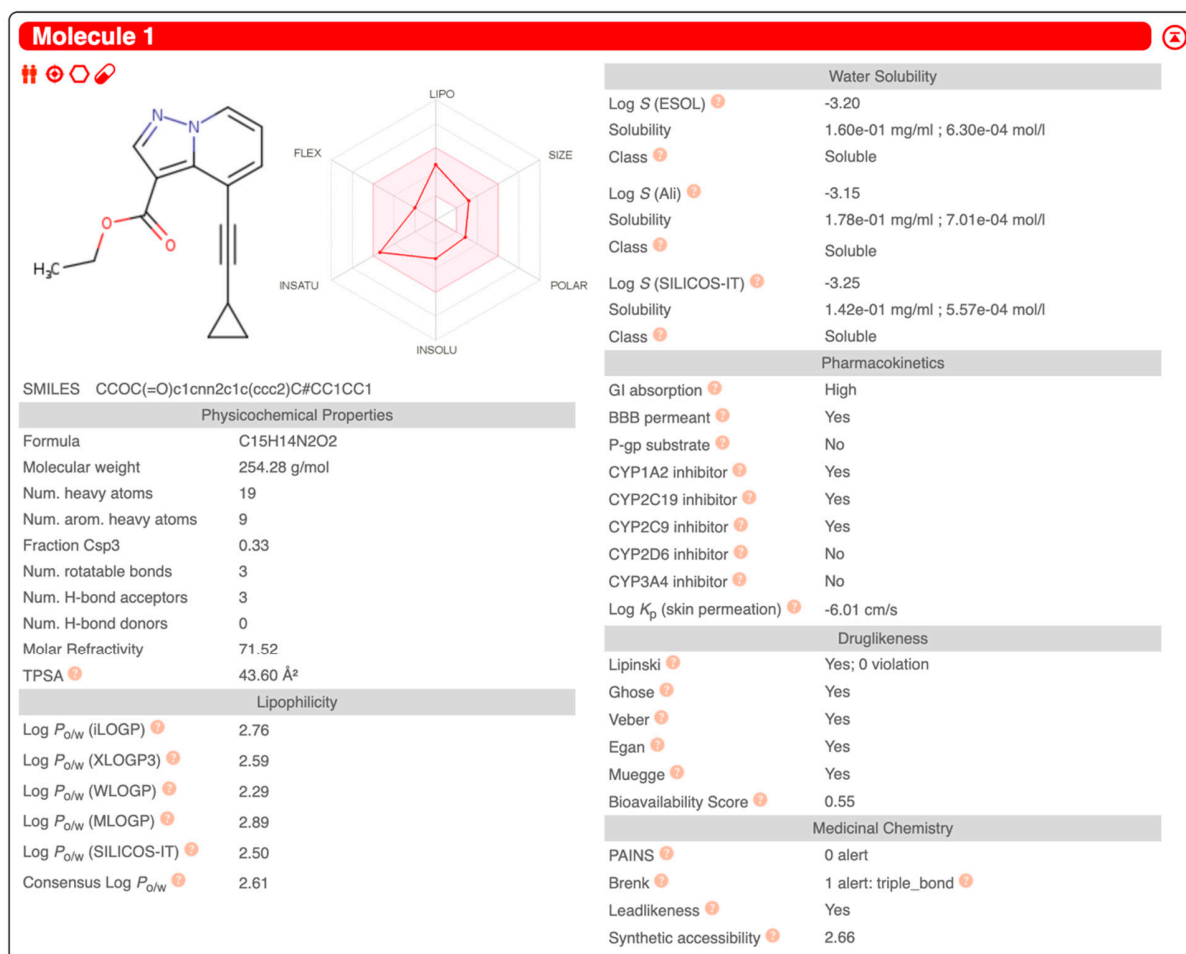

Figure S4. SWISSADME analysis (<http://www.swissadme.ch/>) summary of compound 27.

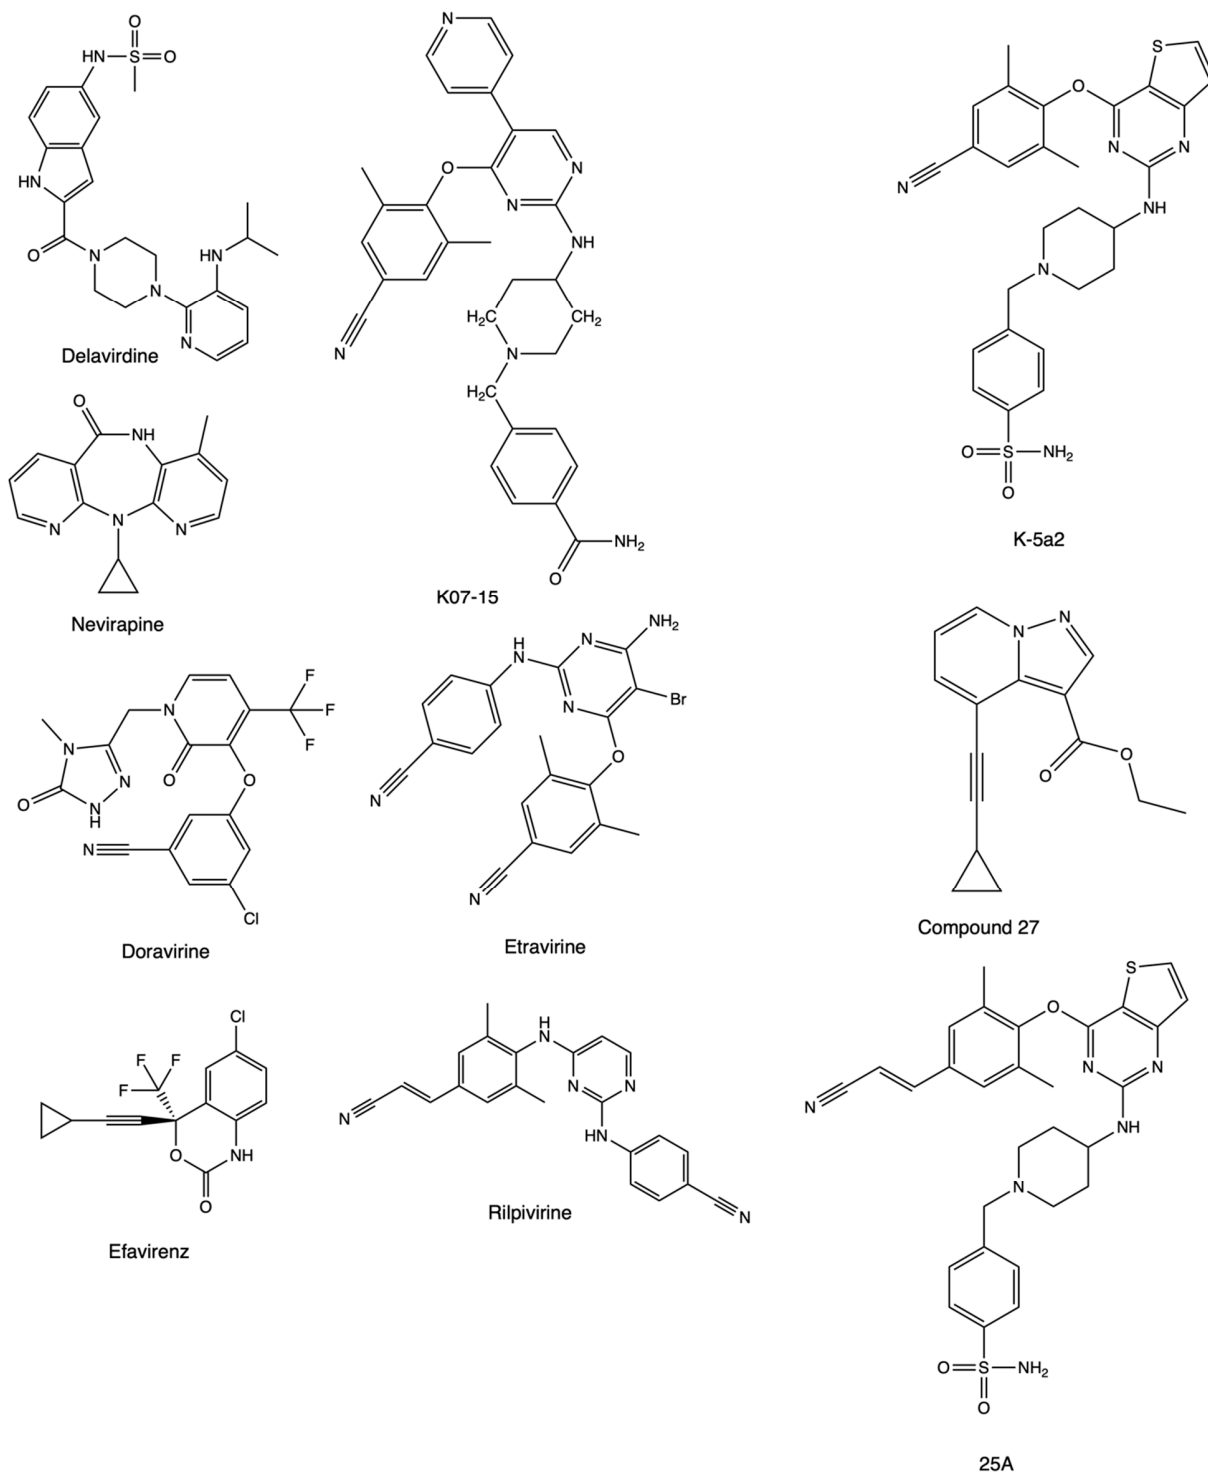

Figure S5. Chemical structures of NNRTIs and compound **27** described in this study.
